# Supplementary material for: Modeling amyotrophic lateral sclerosis (ALS) in vitro : from mechanistic studies to translatable drug discovery
Source: Royal Society of Chemistry journal article supplement (doi:10.1039/d5lc00577a), 2026-01-01
Supplement: d5lc00577a1.pdf [file d5lc00577a1.pdf]

Supplementary table 1. Table showing publications mentioned in this review that have produced or utilised *in vitro* models suitable for ALS research, and the experimental readout methods utilised in

| Publication                                                              | Model description                                                                                                                                                                              | Experimental readouts                                                                                                                         |
|--------------------------------------------------------------------------|------------------------------------------------------------------------------------------------------------------------------------------------------------------------------------------------|-----------------------------------------------------------------------------------------------------------------------------------------------|
| 2D Models                                                                |                                                                                                                                                                                                |                                                                                                                                               |
| Stoklund-Dittlau et al., 2021 <sup>1</sup>                               | 2-chamber microfluidic platform. iLMNs projecting through microchannels to differentiated human myoblasts (figure 3B).                                                                         | Immunocytochemistry<br>Confocal microscopy<br>Calcium imaging                                                                                 |
| Southam et al., 2013 <sup>2</sup> and Blizzard et al., 2015 <sup>3</sup> | 2-chamber microfluidic platform. Primary spinal neurons (on a bed of astrocytes) projecting through microchannels onto C2C12 myoblasts (figure 3C).                                            | Scanning electron microscopy<br>Immunocytochemistry<br>Confocal Microscopy                                                                    |
| Feiler et al., 2015 <sup>4</sup>                                         | 2-chamber microfluidic platform. Primary cortical neurons grown through microchannels to H4 cells in the second chamber (figure 3D).                                                           | Luciferase complementation assay                                                                                                              |
| 3D models                                                                |                                                                                                                                                                                                |                                                                                                                                               |
| Machado et al., 2019 <sup>5</sup>                                        | 3-chamber, open-top microfluidic platform. Differentiated primary myoblasts in the central chamber, ESC-derived motor neuron/astrocyte spheroids in peripheral chambers (figure 3E).           | Immunocytochemistry<br>Optogenetic stimulation<br>Electrophysiology (patch clamp)<br>Quantitative reverse transcription PCR (RT-qPCR)         |
| Osaki et al., 2018 <sup>6</sup>                                          | ALS patient-derived motor neuron spheroid grown through the device onto iPSC derived skeletal muscle fibre. Micropillars in the skeletal muscle chamber measure contraction force (figure 3F). | Optogenetic stimulation<br>Micropillar biosensor integration<br>Calcium imaging<br>Immunocytochemistry<br>Confocal imaging                    |
| Faustino Martins et al., 2020 <sup>7</sup>                               | Non-compartmentalised hESC-derived neuromuscular organoids                                                                                                                                     | Calcium imaging<br>Immunohistochemistry<br>RT-qPCR<br>Live imaging<br>Single cell RNA sequencing<br>Microelectrode array recordings           |
| Andersen et al., 2020 <sup>8</sup>                                       | Non-compartmentalised iPSC-derived corticomotor assembloid.                                                                                                                                    | Calcium imaging<br>Electrophysiology (patch clamp)<br>Viral tracing<br>Optogenetic stimulation<br>Transmission electron microscopy<br>RT-qPCR |

the study.

1. Stoklund Dittlau K, Krasnow EN, Fumagalli L, Vandoorne T, Baatsen P, Kerstens A, et al. Human motor units in microfluidic devices are impaired by FUS mutations and improved by HDAC6 inhibition. *Stem Cell Reports*. 2021;16(9):2213-27.
2. Southam KA, King AE, Blizzard CA, McCormack GH, Dickson TC. Microfluidic primary culture model of the lower motor neuron-neuromuscular junction circuit. *J Neurosci Methods*. 2013;218(2):164-9.
3. Blizzard CA, Southam KA, Dawkins E, Lewis KE, King AE, Clark JA, et al. Identifying the primary site of pathogenesis in amyotrophic lateral sclerosis - vulnerability of lower motor neurons to proximal excitotoxicity. *Dis Model Mech*. 2015;8(3):215-24.
4. Feiler MS, Strobel B, Freischmidt A, Helferich AM, Kappel J, Brewer BM, et al. TDP-43 is intercellularly transmitted across axon terminals. 2015(1540-8140 (Electronic)).
5. Machado CB, Pluchon P, Harley P, Rigby M, Sabater VG, Stevenson DC, et al. In Vitro Modeling of Nerve–Muscle Connectivity in a Compartmentalized Tissue Culture Device. *Advanced Biosystems*. 2019;3(7):1800307.
6. Osaki T, Uzel SGM, Kamm RD. Microphysiological 3D model of amyotrophic lateral sclerosis (ALS) from human iPS-derived muscle cells and optogenetic motor neurons. *Sci Adv*. 2018;4(10):eaat5847.
7. Faustino Martins JM, Fischer C, Urzi A, Vidal R, Kunz S, Ruffault PL, et al. Self-Organizing 3D Human Trunk Neuromuscular Organoids. *Cell Stem Cell*. 2020;27(3):498.
8. Andersen J, Revah O, Miura Y, Thom N, Amin ND, Kelley KW, et al. Generation of Functional Human 3D Cortico-Motor Assembloids. *Cell*. 2020;183(7):1913-29.e26.
